# Supplementary material
Source: PubMed Central journal article supplement (PMC9203980)
Supplement: NIHMS1797220-supplement-Source_Data_Fig_5.pdf [file NIHMS1797220-supplement-Source_Data_Fig_5.pdf]

Fig.5c

b-Actin

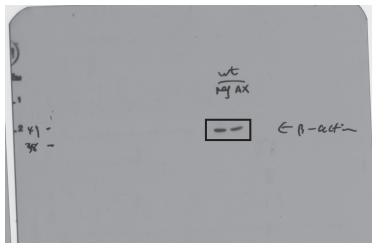

BCL11A

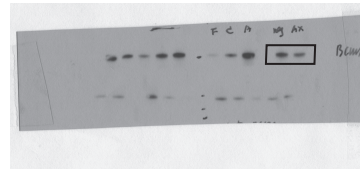

g-globin

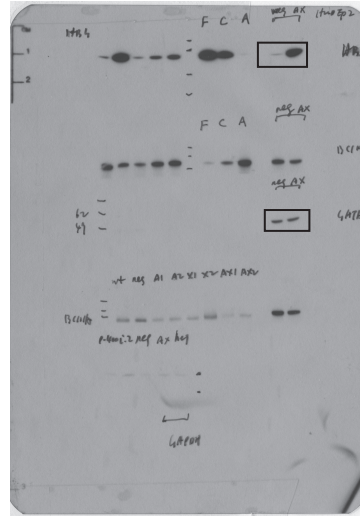

GATA1

LRF

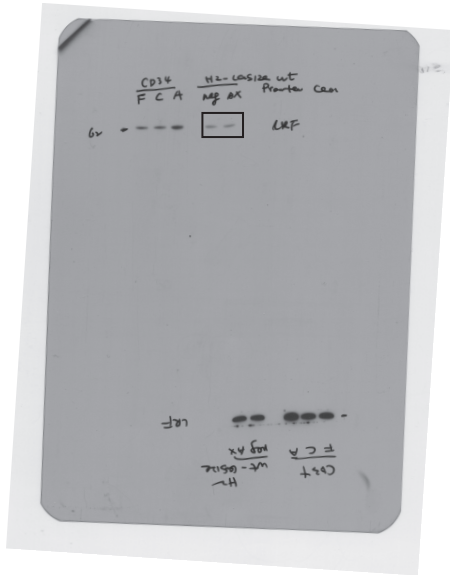

Fig.5d

GATA1

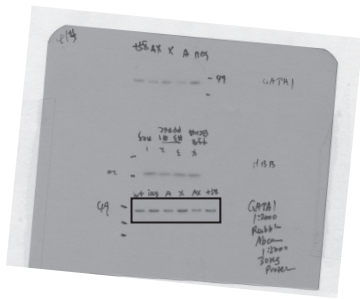

g-globin

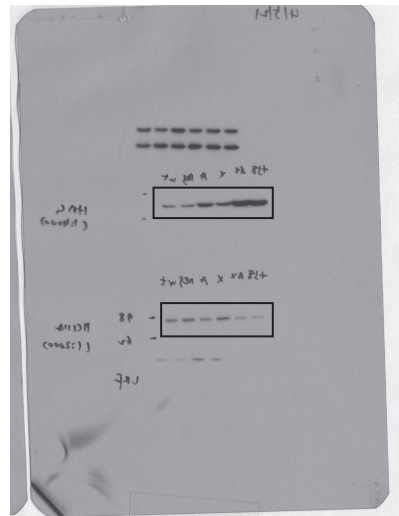

GAPDH

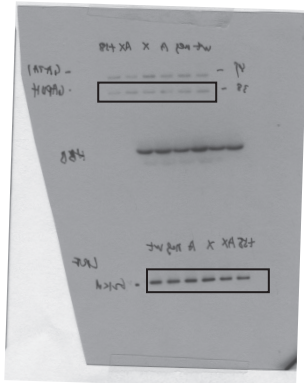

BCL11A

LRF

Fig.5e

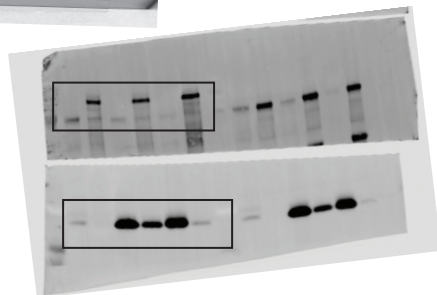

Anti-BCL11A

Anti-HbF

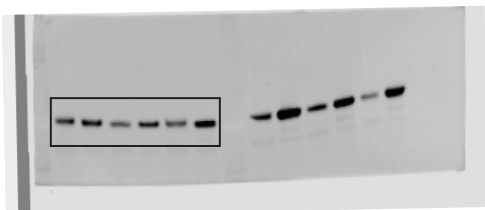

Anti-GAPDH

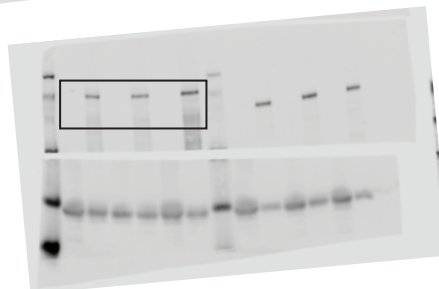

Anti-HA

Anti-HbB
