# Supplementary material
Source: PubMed Central journal article supplement (PMC9203980)
Supplement: NIHMS1797220-supplement-Supplementary_Information.pdf [file NIHMS1797220-supplement-Supplementary_Information.pdf]

**Supplementary Information**

**Supplementary Table 6. AsCas12a sgRNA Oligos**

|                   |                                            |
|-------------------|--------------------------------------------|
| Negative 1f       | AGATGGCAGCAGATTTAAGCTCCCAATAATTTCT         |
| Negative 2f       | ACTCTTGTAGATCCATGCCAACCAACTGTTGATTA        |
| Negative 1r       | GAGTAGAAATTATTGGGAGCTTAAATCTGCTGCC         |
| Negative 2r       | AATTTAATCAACAGTTGGTTGGCATGGATCTACAA        |
| NFIA 1f           | AGATCAAGGCGCTCGCCATCAGTACTTAATTTCT         |
| NFIA 2f           | ACTCTTGTAGATCCATGCCAACCAACTGTTGATTA        |
| NFIA 1r           | GAGTAGAAATTAAGTACTGATGGCGAGCGCCTTG         |
| NFIA 2r           | AATTTAATCAACAGTTGGTTGGCATGGATCTACAA        |
| NFIX 1f           | AGATGGCAGCAGATTTAAGCTCCCAATAATTTCT         |
| NFIX 2f           | ACTCTTGTAGATTGACTTCCGGGGTCTGGAATGTG        |
| NFIX 1r           | GAGTAGAAATTATTGGGAGCTTAAATCTGCTGCC         |
| NFIX 2r           | AATTCACATTCCAGACCCCGGAAGTCAATCTACAA        |
| NFIC 1f           | AGATCAGATGCAGAGCAAAGCGGCAGTAATTTCT         |
| NFIC 2f           | ACTCTTGTAGATCCATGCCAACCAACTGTTGATTA        |
| NFIC 1r           | GAGTAGAAATTACTGCCGCTTTGCTCTGCATCTG         |
| NFIC 2r           | AATTTAATCAACAGTTGGTTGGCATGGATCTACAA        |
| NFIA&NFIX 1f      | AGATCAAGGCGCTCGCCATCAGTACTTAATTTCT         |
| NFIA&NFIX 2f      | ACTCTTGTAGATTGACTTCCGGGGTCTGGAATGTG        |
| NFIA&NFIX 1r      | GAGTAGAAATTAAGTACTGATGGCGAGCGCCTTG         |
| NFIA&NFIX 2r      | AATTCACATTCCAGACCCCGGAAGTCAATCTACAA        |
| NFIA&NFIX&NFIC 1f | AGATCAAGGCGCTCGCCATCAGTACTTAATTTCT         |
| NFIA&NFIX&NFIC 2f | ACTCTTGTAGATCAGATGCAGAGCAAAGCGGCAGTAATTTCT |
| NFIA&NFIX&NFIC 3f | ACTCTTGTAGATTGACTTCCGGGGTCTGGAATGTG        |
| NFIA&NFIX&NFIC 1r | GAGTAGAAATTAAGTACTGATGGCGAGCGCCTTG         |
| NFIA&NFIX&NFIC 2r | GAGTAGAAATTACTGCCGCTTTGCTCTGCATCTGATCTACAA |
| NFIA&NFIX&NFIC 3r | AATTCACATTCCAGACCCCGGAAGTCAATCTACAA        |
| BCL11A +58 f      | AGATTCACAGGCTCCAGGAAGGGTTTG                |
| BCL11A +58 r      | AATTCAAACCCTTCCTGGAGCCTGTGA                |

**Supplementary Table 7. SpCas9 sgRNA Oligos**

|                   |                           |
|-------------------|---------------------------|
| Negative controlF | caccgGCACTACCAGAGCTAACTCA |
| NFIA #1F          | caccgCACAGACTTGAGGCGCTTTG |
| NFIA #2F          | caccgAACATCAACCAGGTGACCCT |
| NFIX #1F          | caccgGCATGAGTCCAGGAGCAATG |
| NFIX #2F          | caccgCAGCTACTACAACATCAACC |
| BCL11A +58F       | caccgCTAACAGTTGCTTTTATCAC |
| NFI-451F          | caccgGTGAAATGTGTTTTAGGCAT |
| NFI202F           | caccgCCTGTGCCTGGCAAAGTCC  |
| Negative controlR | aaacTGAGTTAGCTCTGGTAGTGc  |
| NFIA #1R          | aaacCAAAGCGCCTCAAGTCTGTGc |
| NFIA #2R          | aaacAGGGTCACCTGGTTGATGTTc |
| NFIX #1R          | aaacCATTGCTCCTGGACTCATGc  |
| NFIX #2R          | aaacGGTTGATGTTGTAGTAGCTGc |
| BCL11A +58R       | aaacGTGATAAAAGCAACTGTTAGc |
| NFI-451R          | aaacATGCCTAAAACACATTTACc  |
| NFI202R           | aaacGGACTTTTGCCAGGCACAGGc |

**Supplementary Table 8. Cas9 RNP sgRNAs**

|                  |                      |
|------------------|----------------------|
| Negative control | GCACUACCAGAGCUAACUCA |
| NFIA             | CACAGACTTGAGGCGCTTTG |
| NFIX             | CAGCTACTACAACATCAACC |
| BCL11A +58       | CTAACAGTTGCTTTTATCAC |

**Supplementary Table 9. Indel detection primers**

|               |                        |
|---------------|------------------------|
| HBGi_TIDE_F   | ccctggctaaactccacccat  |
| HBGi_TIDE_R   | aggcaacagtgtgaaacatct  |
| HBG400_TIDE_F | cgggtgcctacatacatacctg |
| HBG400_TIDE_R | gagatagtgtggggaaggggc  |
| NFIA12aTIDE f | TGCGGAAAGATATCCGACCC   |
| NFIA12aTIDE r | ACCAACGCCTCTGAAAACACT  |

|                 |                       |
|-----------------|-----------------------|
| BCL11A12aTIDE f | AGGAAGGCAGCTAGACAGGA  |
| BCL11A12aTIDE r | GGAGGCAAGTCAGTTGGGAA  |
| NFIX12aTIDE2f   | GCTGTCCCTTGACTGAGCTT  |
| NFIX12aTIDE2r   | GAGGAACCTCCTCCCAGCTA  |
| NFIC12aTIDE3f   | TGTGTTTTGGGGCCACTGT   |
| NFIC12aTIDE3r   | CATGGGACCGTAGAACCCCTC |

**Supplementary Table 10. RT-qPCR primers**

|                |                        |
|----------------|------------------------|
| Gamma_globin_F | TGGCAAGAAGGTGCTGACTTC  |
| Gamma_globin_R | GCAAAGGTGCCCTTGAGATC   |
| Beta_globin_F  | TGGGCAACCCTAAGGTGAAG   |
| Beta_globin_R  | GTGAGCCAGGCCATCACTAAA  |
| Alpha_globin_F | AAGACCTACTTCCCGCACTTC  |
| Alpha_globin_R | GTTGGGCATGTCGTCCAC     |
| ALAS2_F        | CAGCGCAATGTCAAGCAC     |
| ALAS2_R        | TAGATGCCATGCTTGGAGAG   |
| BAND3_F        | ACCTCTCTCACCTCACCTTCTG |
| BAND3_R        | AACCTGTCTAGCAGTTGGTTGG |
| GATA1_F        | CTGTCCCCAATAGTGCTTATGG |
| GATA1_R        | GAATAGGCTGCTGAATTGAGGG |
| BCL11A_F       | ACAAACGGAAACAATGCAATGG |
| BCL11A_R       | TTTCATCTCGATTGGTGAAGGG |
| ZBTB7A_F       | GCTTGGGCGCGTTGAATGTA   |
| ZBTB7A_R       | GGCTGTGAAGTTACCGTCGG   |

**Supplementary Table 11. EMSA Oligos**

|              |                          |
|--------------|--------------------------|
| emsa_59enF   | CCATCGGTGGCCGTTTGCCCAGGG |
| emsa_59enR   | CCCTGGGCAAACGGCCACCGATGG |
| emsa_23enF   | TGAACTTGGCCGAGGGCCAGGCTT |
| emsa_23enR   | AAGCCTGGCCCTCGGCCAAGTTCA |
| emsa_hbgproF | AAATCCTGGACCTATGCCTAAAAC |
| emsa_hbgproR | GTTTTAGGCATAGGTCCAGGATTT |
| emsa_hbginF  | GTGCCTGGCAAAAGTCCAGGTCGC |
| emsa_hbginR  | GCGACCTGGACTTTTGCCAGGCAC |

|                 |                            |
|-----------------|----------------------------|
| emsa_hbgproF_m1 | AAATCCTGGACCTATGATTA AAAAC |
| emsa_hbgproR_m1 | GTTTTAATCATAGGTCCAGGATTT   |
| emsa_hbgproF_m2 | AAATCCTATACCTATGCCTAAAAC   |
| emsa_hbgproR_m2 | GTTTTAGGCATAGGTATAGGATTT   |
| emsa_hbginF_m1  | GTGCCTGGCAA AAGTATAGGTCGC  |
| emsa_hbginR_m1  | GCGACCTATACTTTTGCCAGGCAC   |
| emsa_hbginF_m2  | GTGCCTATCAA AAGTCCAGGTCGC  |
| emsa_hbginR_m2  | GCGACCTGGACTTTTGATAGGCAC   |
| emsa_random_F   | AAAAGTTCAGGGATTGTGAAATG    |
| emsa_random_R   | CATTCACAATCCCTGAACTTTT     |
