# Supplementary material
Source: PubMed Central journal article supplement (PMC9203980)

Extended Data Fig. 1c

b-Actin

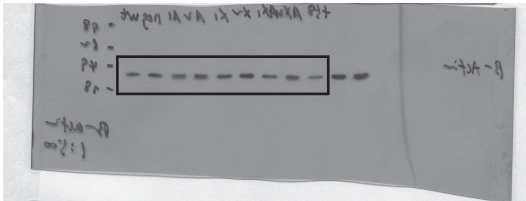

NFIX

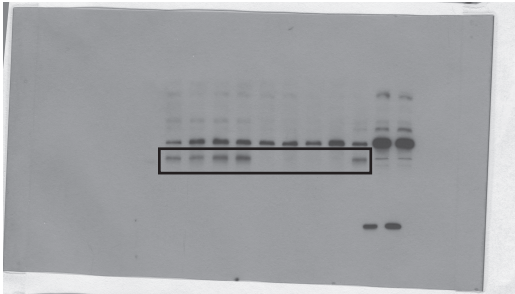

NFIA

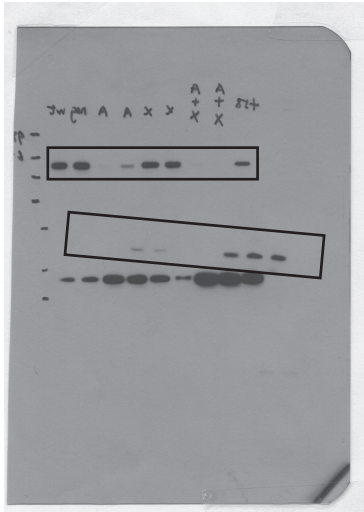

g-globin

Supplement: NIHMS1797220-supplement-Source_Data_Extended_Data_Fig_1.pdf [file NIHMS1797220-supplement-Source_Data_Extended_Data_Fig_1.pdf]

Extended Data Fig. 2a

NFIA

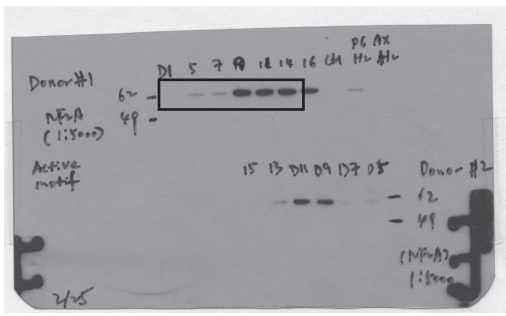

NFIX

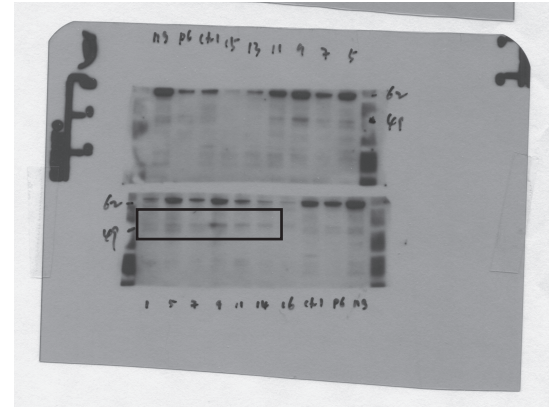

GAPDH

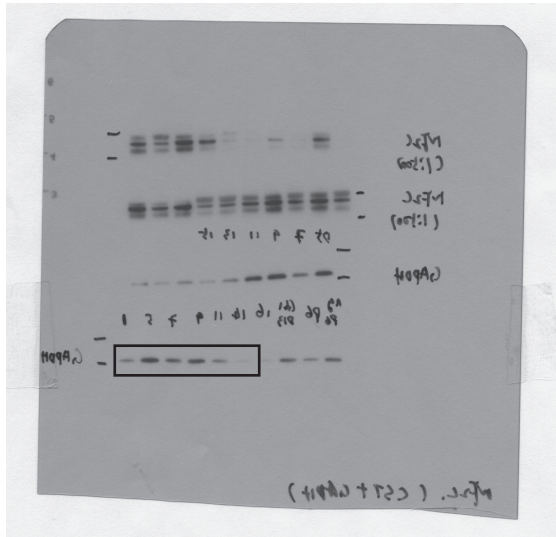

g-globin

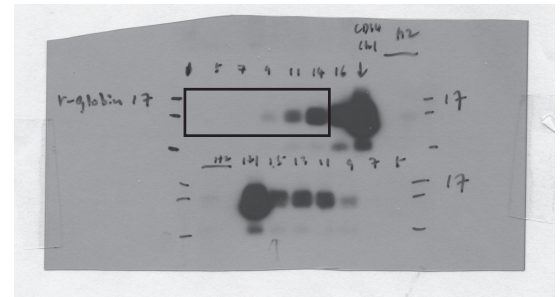

Supplement: NIHMS1797220-supplement-Source_Data_Extended_Data_Fig_2.pdf [file NIHMS1797220-supplement-Source_Data_Extended_Data_Fig_2.pdf]

Extended Data Fig. 3b

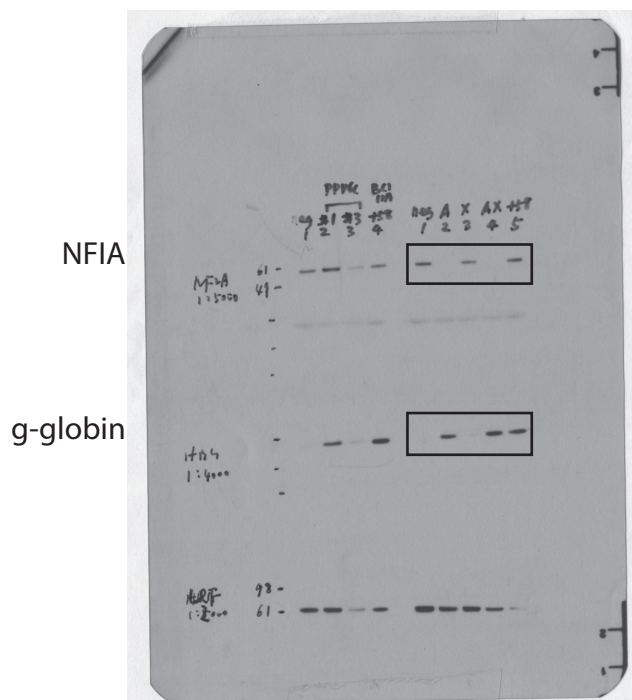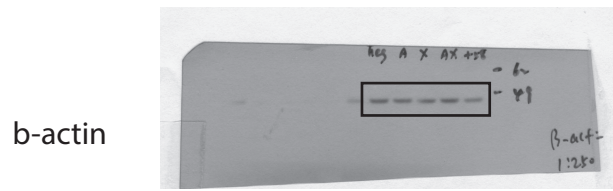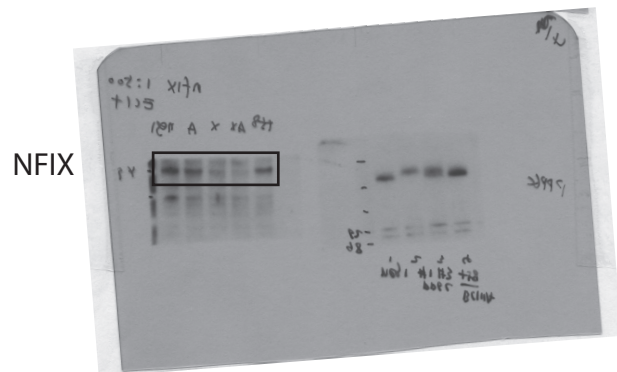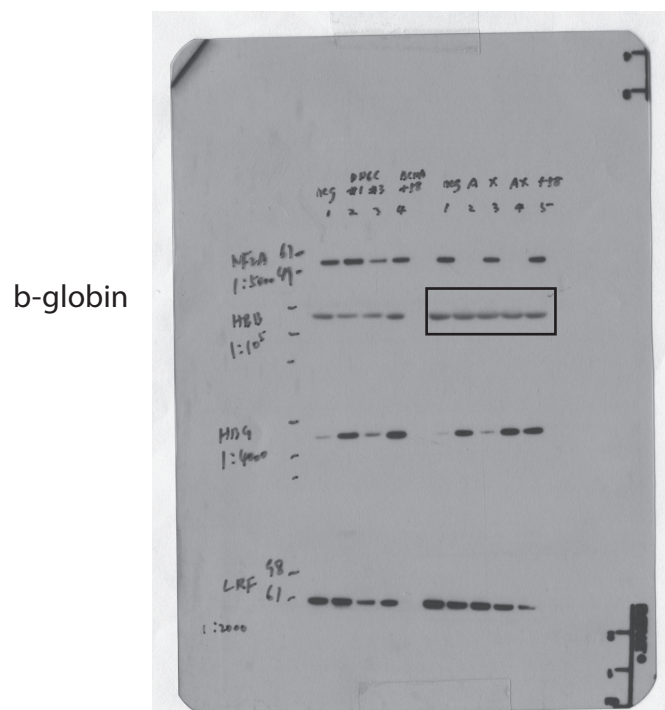

Supplement: NIHMS1797220-supplement-Source_Data_Extended_Data_Fig_3.pdf [file NIHMS1797220-supplement-Source_Data_Extended_Data_Fig_3.pdf]

Extended Data Fig. 8e

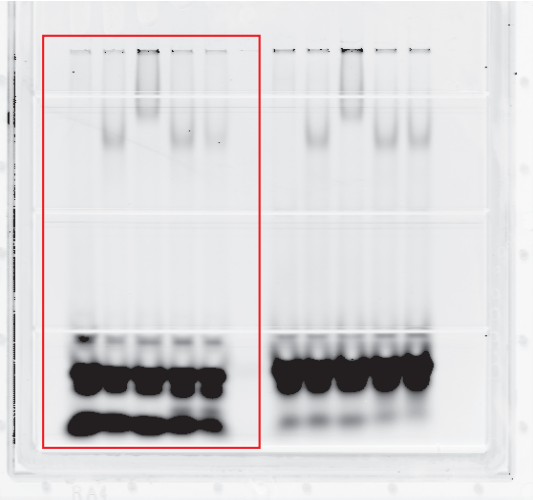

Extended Data Fig. 8f

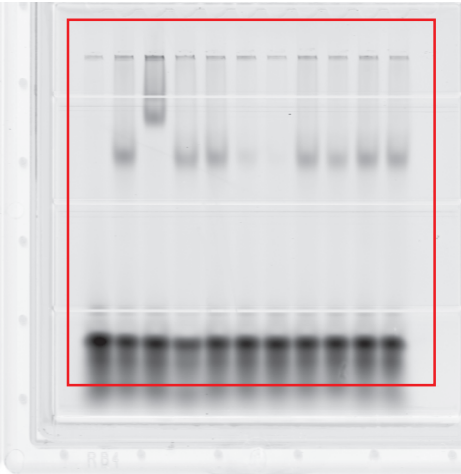

Extended Data Fig. 8g

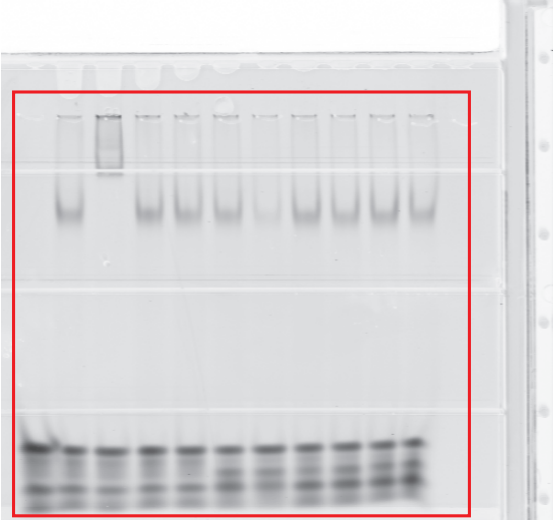

Supplement: NIHMS1797220-supplement-Source_Data_Extended_Data_Fig_8.pdf [file NIHMS1797220-supplement-Source_Data_Extended_Data_Fig_8.pdf]

Fig.1c

NFIA

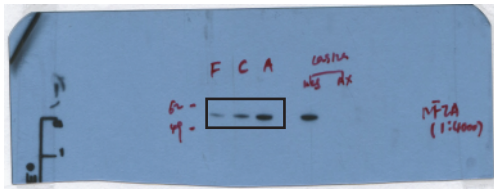

GAPDH

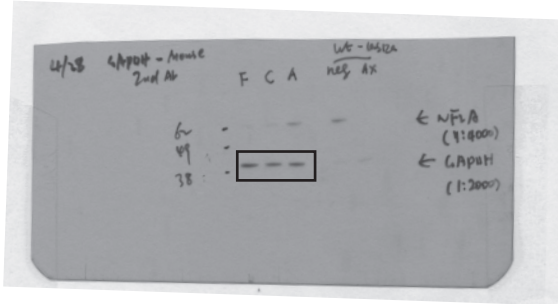

NFIX

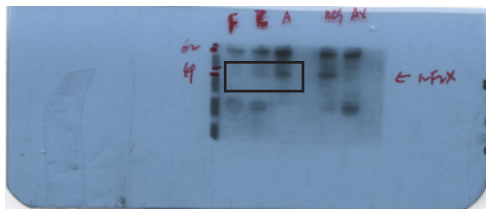

BCL11A

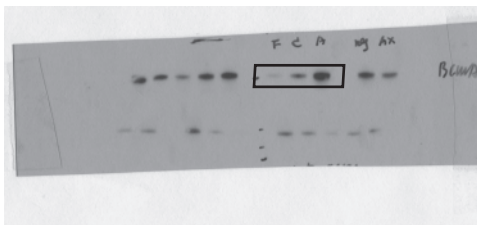

NFIC

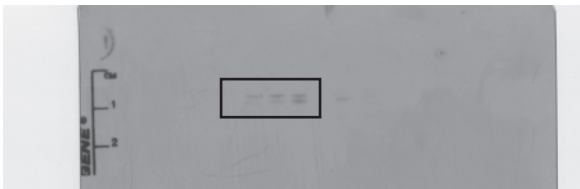

g-globin

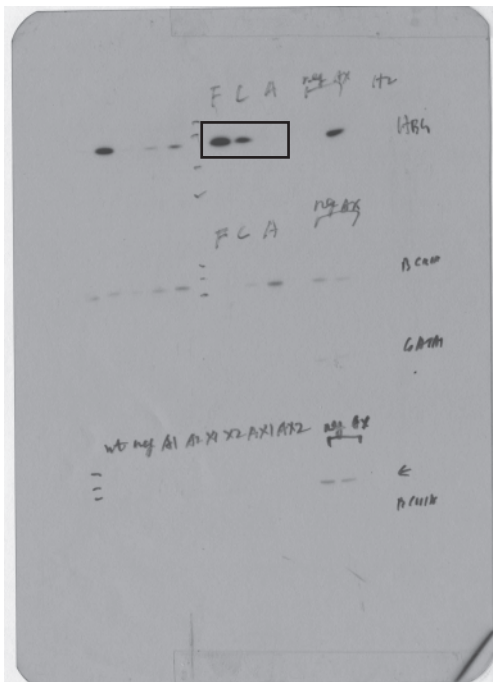

Fig.1d

NFIA

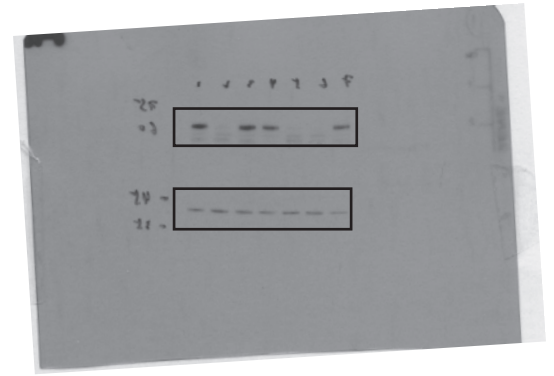

b-Actin

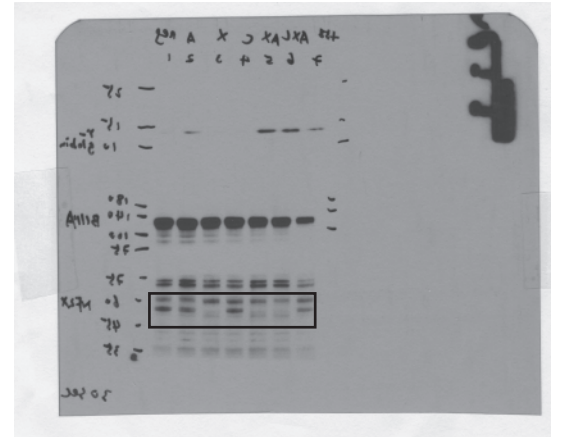

NFIX

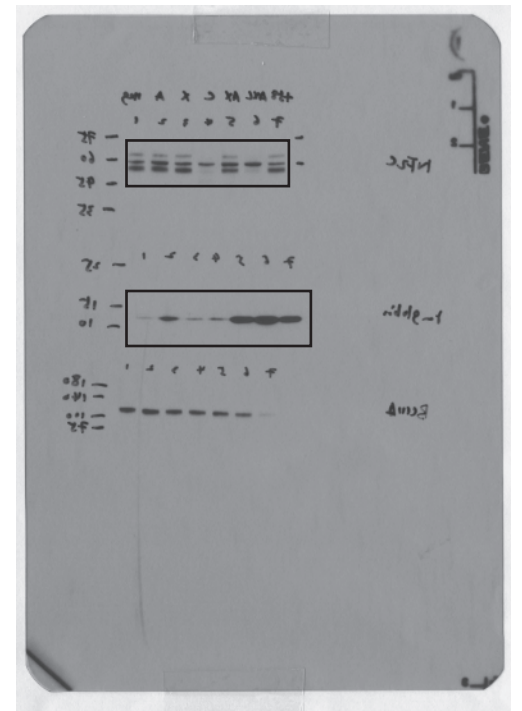

g-globin

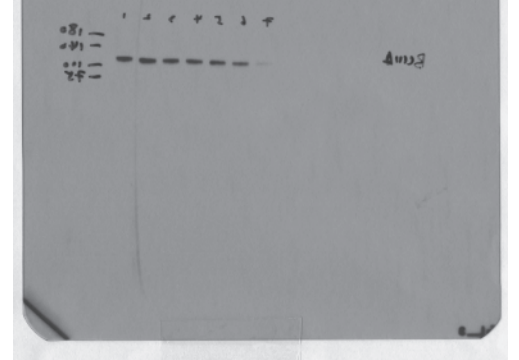

Supplement: NIHMS1797220-supplement-Source_Data_Fig_1.pdf [file NIHMS1797220-supplement-Source_Data_Fig_1.pdf]

Fig. 2a

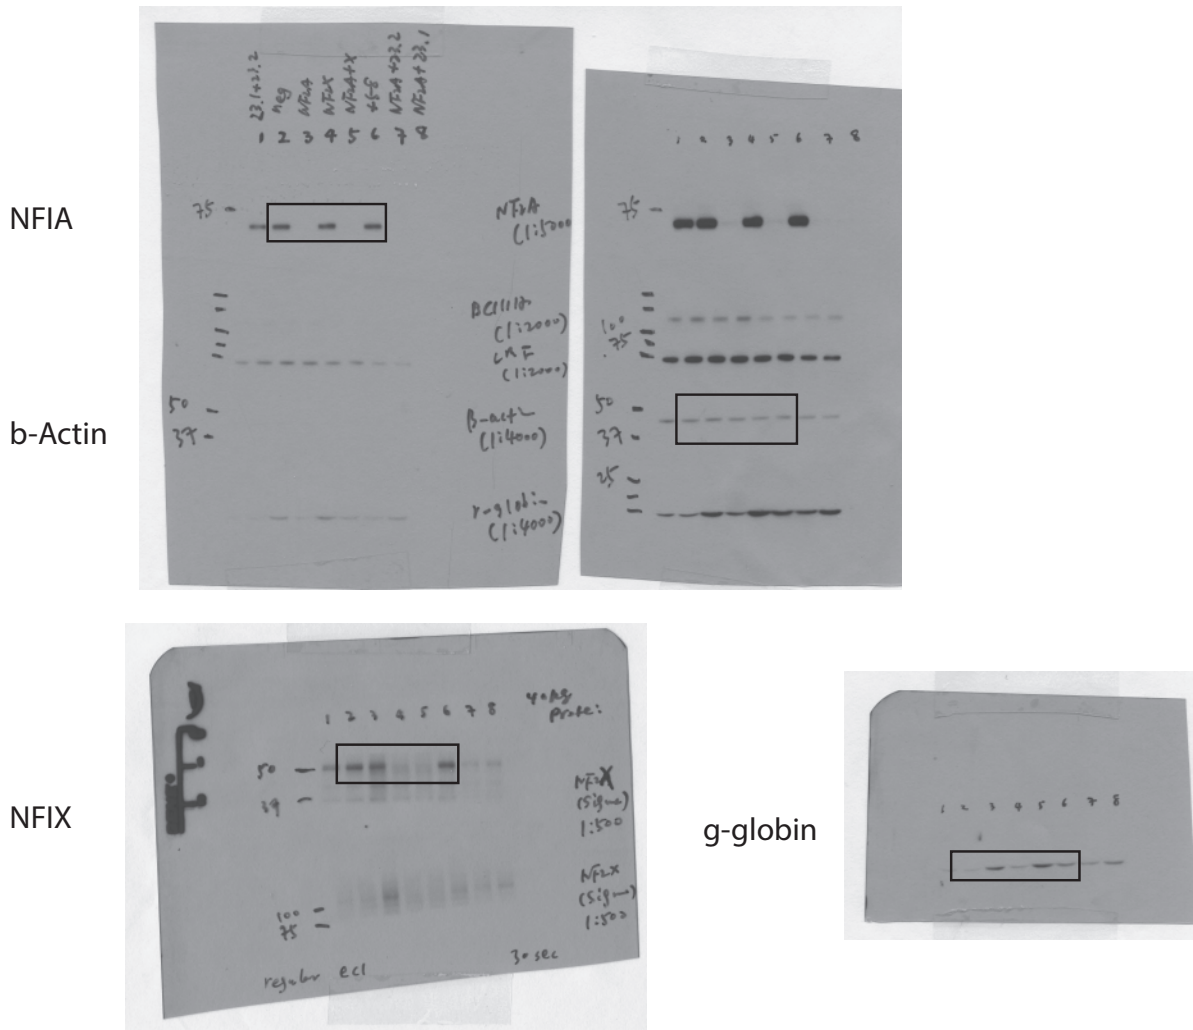

Supplement: NIHMS1797220-supplement-Source_Data_Fig_2.pdf [file NIHMS1797220-supplement-Source_Data_Fig_2.pdf]

Fig. 6e

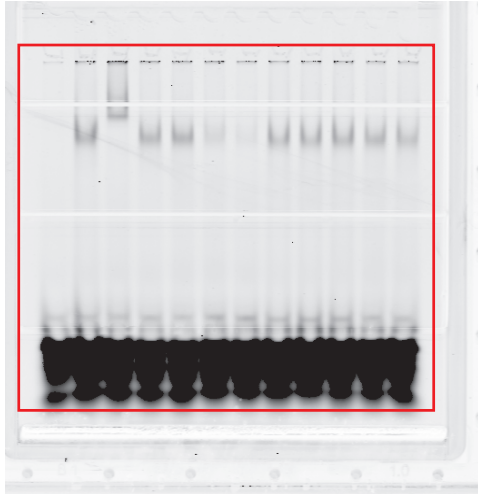

Supplement: NIHMS1797220-supplement-Source_Data_Fig_6.pdf [file NIHMS1797220-supplement-Source_Data_Fig_6.pdf]
